# Supplementary material for: Stable Isotope Signatures of Middle Palaeozoic Ahermatypic Rugose Corals – Deciphering Secondary Alteration, Vital Fractionation Effects, and Palaeoecological Implications
Source: PubMed Central journal article supplement (PMC4559396; doi:10.1371/journal.pone.0136289), 2015-09-03
Supplement: pone.0136289.s001.pdf [file pone.0136289.s001.pdf]

| Period     | Epoch    | Stage        | Time       |                                                                                                                           |
|------------|----------|--------------|------------|---------------------------------------------------------------------------------------------------------------------------|
| Devonian   | Upper    | Famennian    | 359 Ma     |                                                                                                                           |
|            |          | Frasnian     | 372 Ma     |                                                                                                                           |
|            | Middle   | Givetian     | 382.5 Ma   |                                                                                                                           |
|            |          | Eifelian     | 387.5 Ma   | <i>M. roberti</i> , <i>M. tortuosus</i><br>(Morocco)<br><i>M. praecox</i> , <i>C. sandalina</i><br>(Holy Cross Mountains) |
|            | Lower    | Emsian       | 393.5 Ma   |                                                                                                                           |
|            |          | Pragian      | 407.5 Ma   |                                                                                                                           |
|            |          | Lochkovian   | 411 Ma     |                                                                                                                           |
|            | Silurian | Pridoli      | 419 Ma     |                                                                                                                           |
|            |          | Ludlow       | Ludfordian | 423 Ma                                                                                                                    |
| Gorstian   |          |              | 425.5 Ma   |                                                                                                                           |
| Wenlock    |          | Homerian     | 427.5 Ma   |                                                                                                                           |
|            |          | Sheinwoodian | 430.5 Ma   |                                                                                                                           |
| Llandovery |          | Telychian    | 433.5 Ma   | <i>P. porpitus</i><br>(Gotland)                                                                                           |
|            |          | Aeronian     | 438.5 Ma   |                                                                                                                           |
|            |          | Rhuddanian   | 440.5 Ma   |                                                                                                                           |
|            |          |              | 444 Ma     |                                                                                                                           |

**S1 Figure. Middle Palaeozoic stratigraphic chart (after Cohen et al., 2013), with indicated stratigraphic positions of the studied specimens.**

## Reference

Cohen KM, Finney SC, Gibbard PL, Fan J-X. The ICS International Chronostratigraphic Chart. Episodes. 2013 (updated); 36:199-204.
